# Supplementary material for: Fe(iii)-catalyzed α-terpinyl derivatives synthesis from β-pinene via reactions with hydrogen peroxide in alcoholic solutions
Source: Royal Society of Chemistry journal article supplement (doi:10.1039/c4ra13112f), 2014-12-22
Supplement: c4ra13112f1.pdf [file c4ra13112f1.pdf]

# Fe(III)-catalyzed $\alpha$ -terpinyl derivatives synthesis from $\beta$ -pinene via reactions with hydrogen peroxide in alcoholic solutions

M. J. da Silva<sup>a</sup>, D. M. Carari<sup>b</sup> and Adalberto Manoel da Silva<sup>a</sup>

Supplementar material

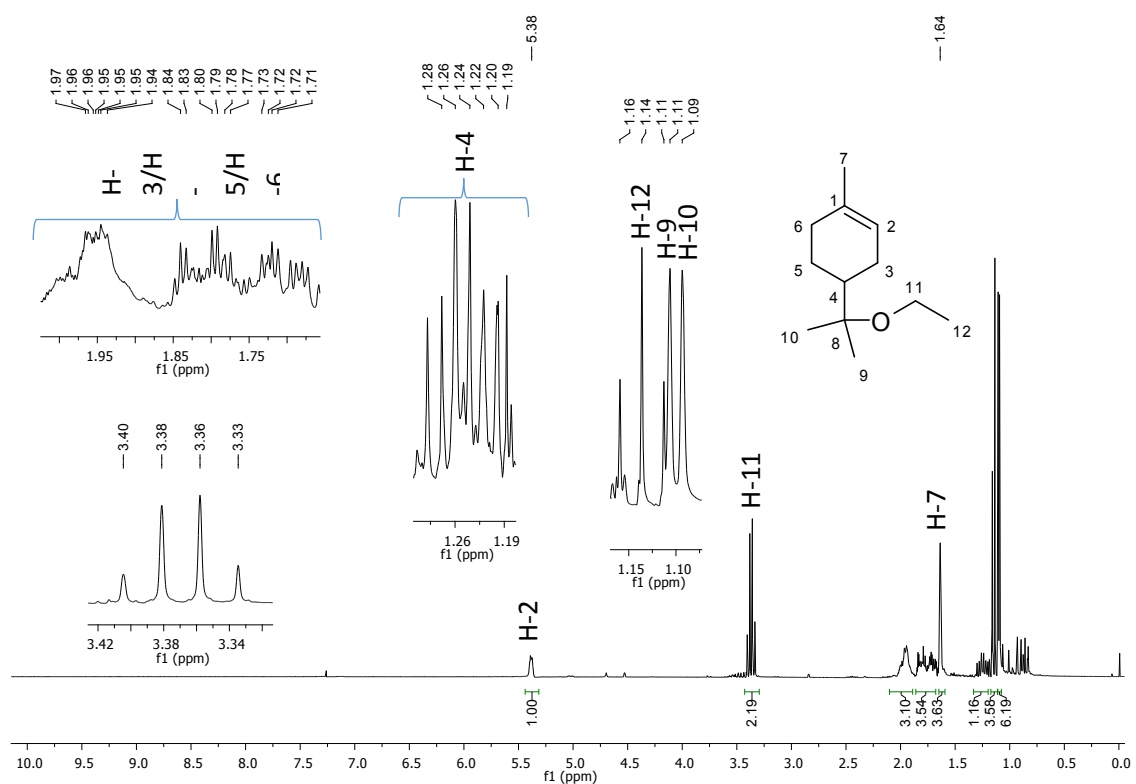

FIGURE 1: NMR <sup>1</sup>H of spectrum 4-(2-ethoxypropan-2-yl)-1-methylcyclohex-1-ene (CDCl<sub>3</sub>, 300 MHz).

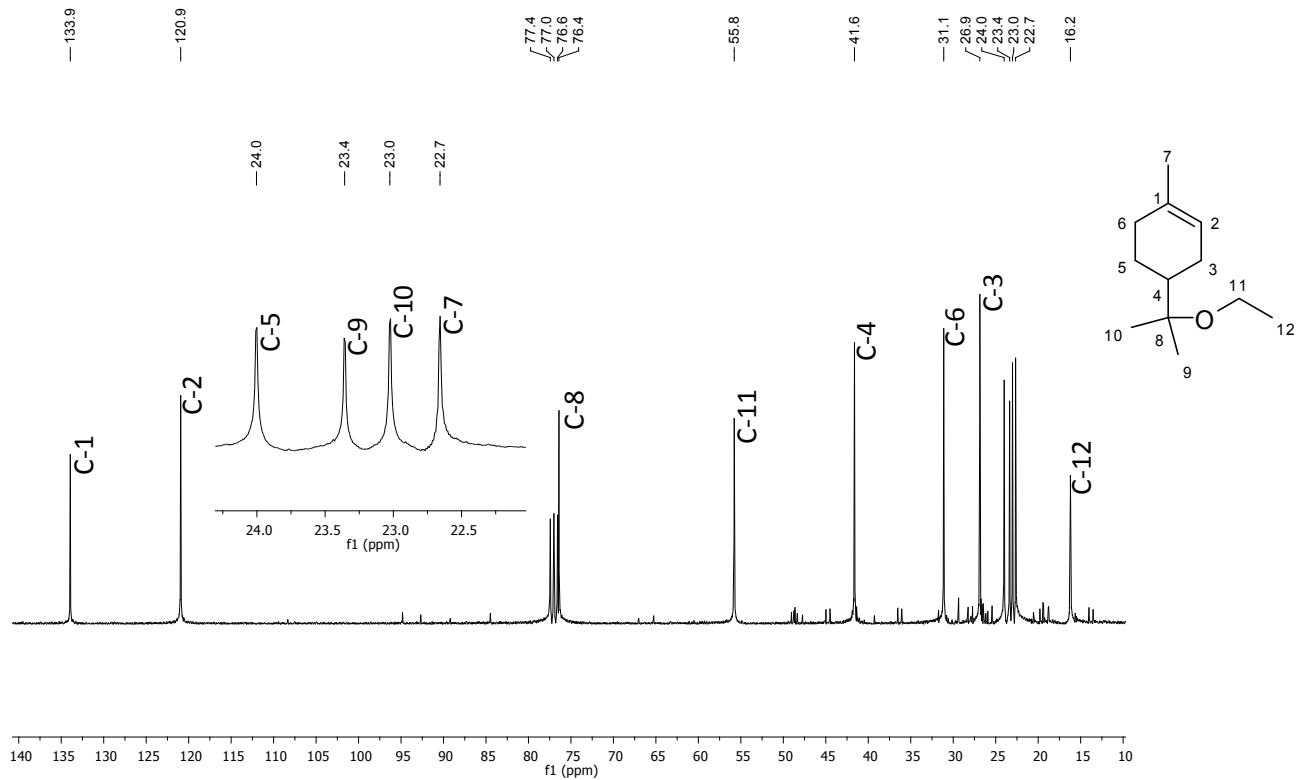

FIGURE 2: NMR  $^{13}\text{C}$  spectrum of 4-(2-ethoxypropan-2-yl)-1-methylcyclohex-1-ene ( $\text{CDCl}_3$ , 75 MHz).

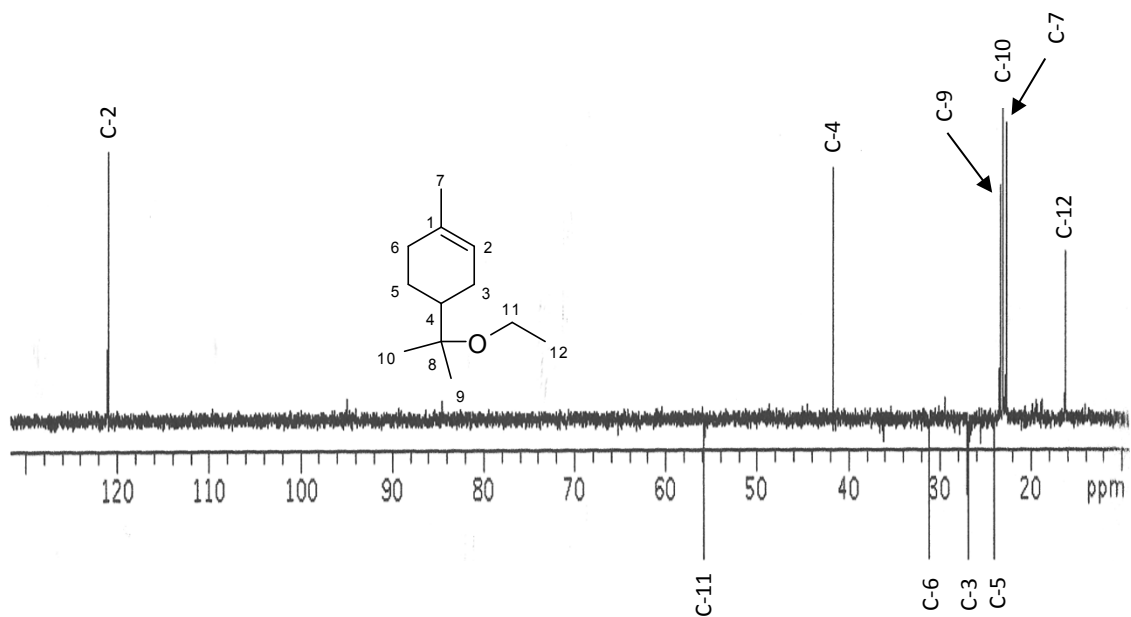

FIGURE 3: DEPT 135 of 4-(2-ethoxypropan-2-yl)-1-methylcyclohex-1-ene.

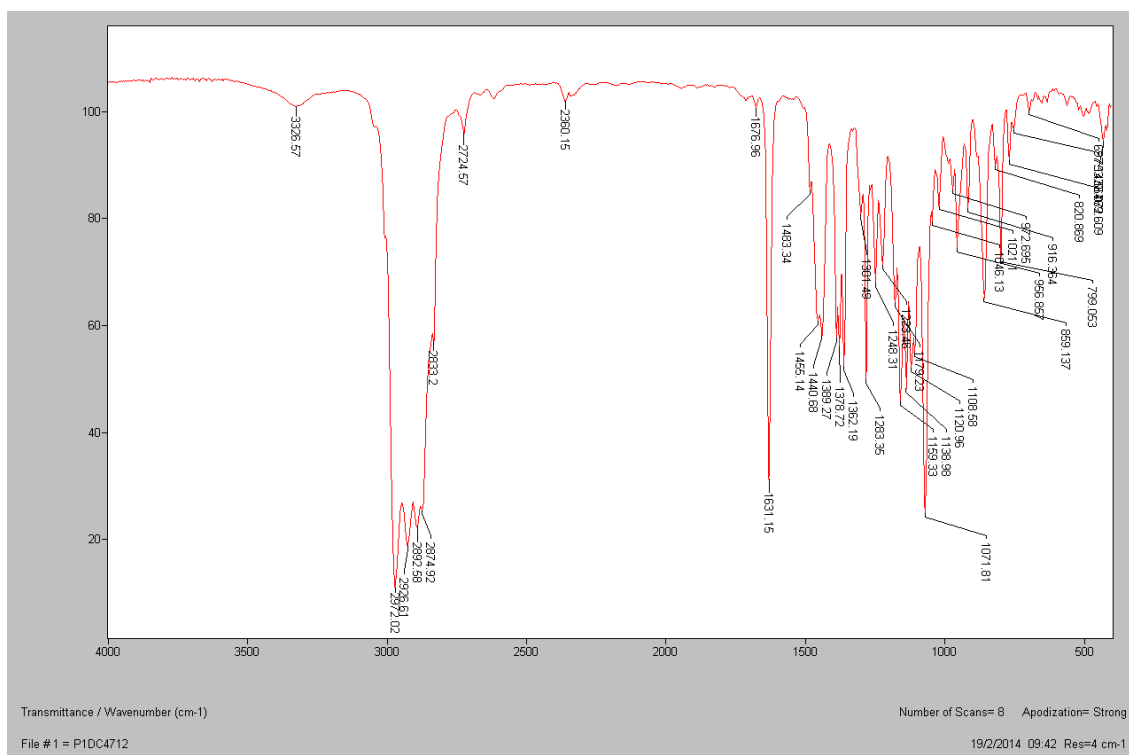

**FIGURE 4:** Infrared spectrum of 4-(2-ethoxypropan-2-yl)-1-methylcyclohex-1-ene (KBr).

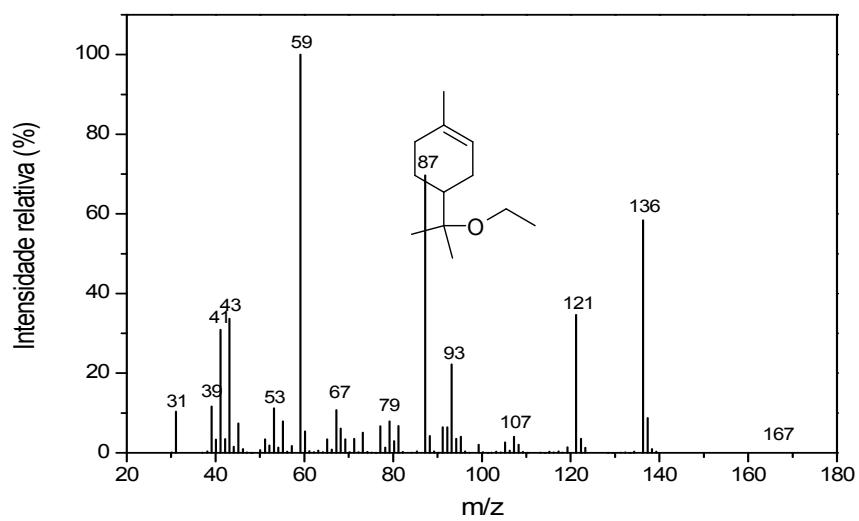

**FIGURE 5:** Mass spectrum of 4-(2-ethoxypropan-2-yl)-1-methylcyclohex-1-ene (EI - 70 eV).

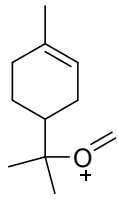

m/z 167

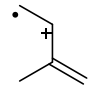

m/z 68

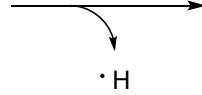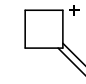

m/z 67

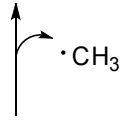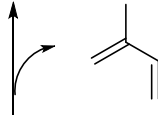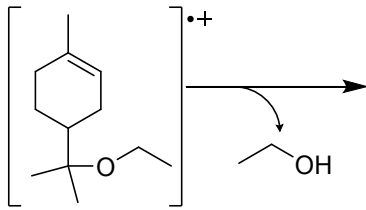

$M^{*+} = 182$

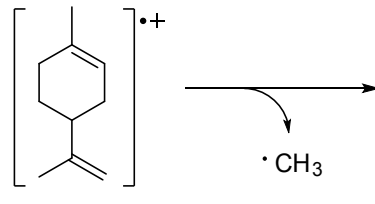

m/z 136

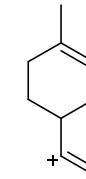

m/z 121

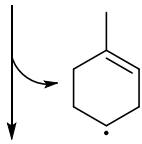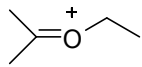

m/z 87

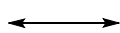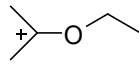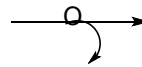

$\equiv$

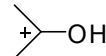

m/z 59

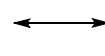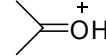

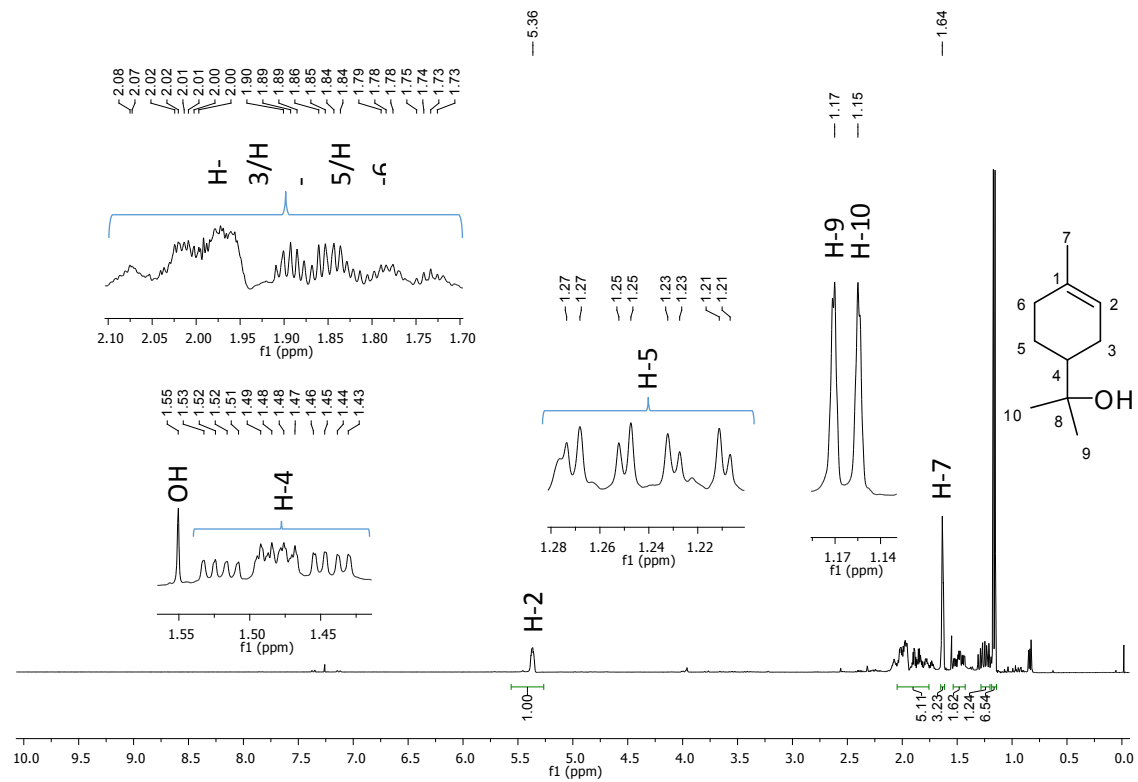

**FIGURE 6:** NMR  $^1\text{H}$  spectrum of  $\alpha$ -terpineol (2-(4-methylcyclohex-3-enyl)propan-2-ol) ( $\text{CDCl}_3$ , 300 MHz).

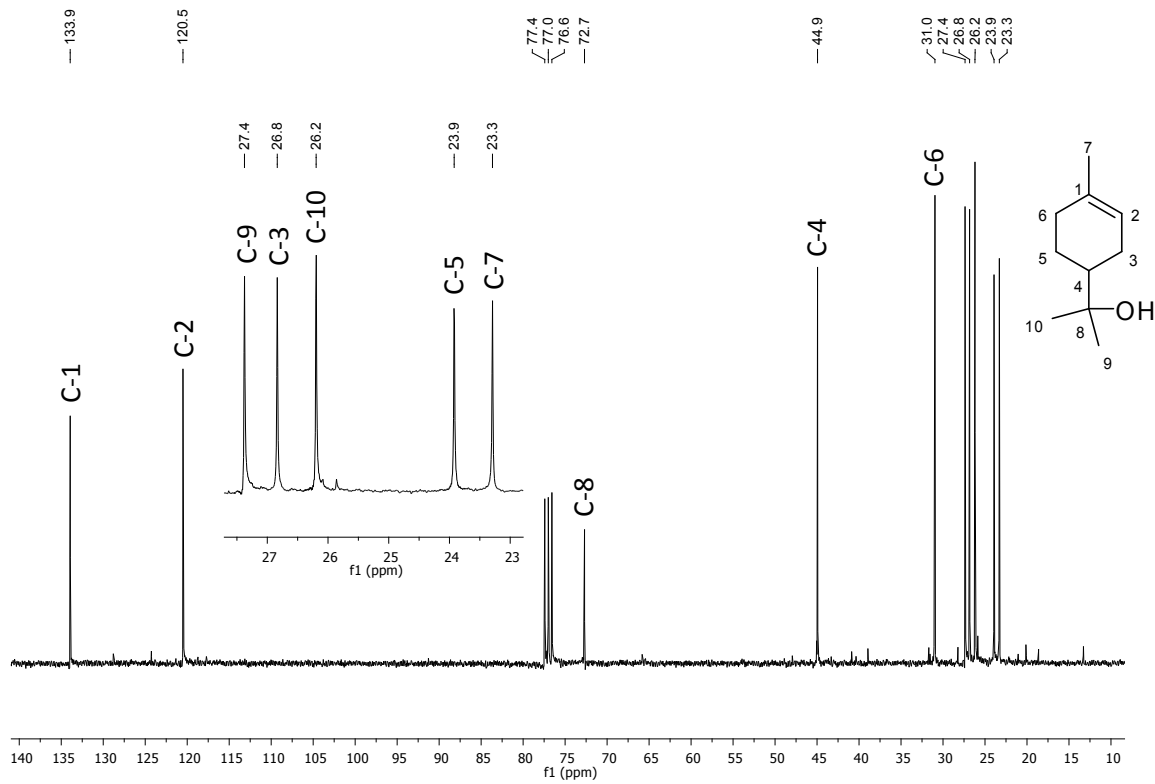

**FIGURE 7:** NMR <sup>13</sup>C spectrum of  $\alpha$ -terpineol (2-(4-methylcyclohex-3-enyl)propan-2-ol) (CDCl<sub>3</sub>, 75 MHz).

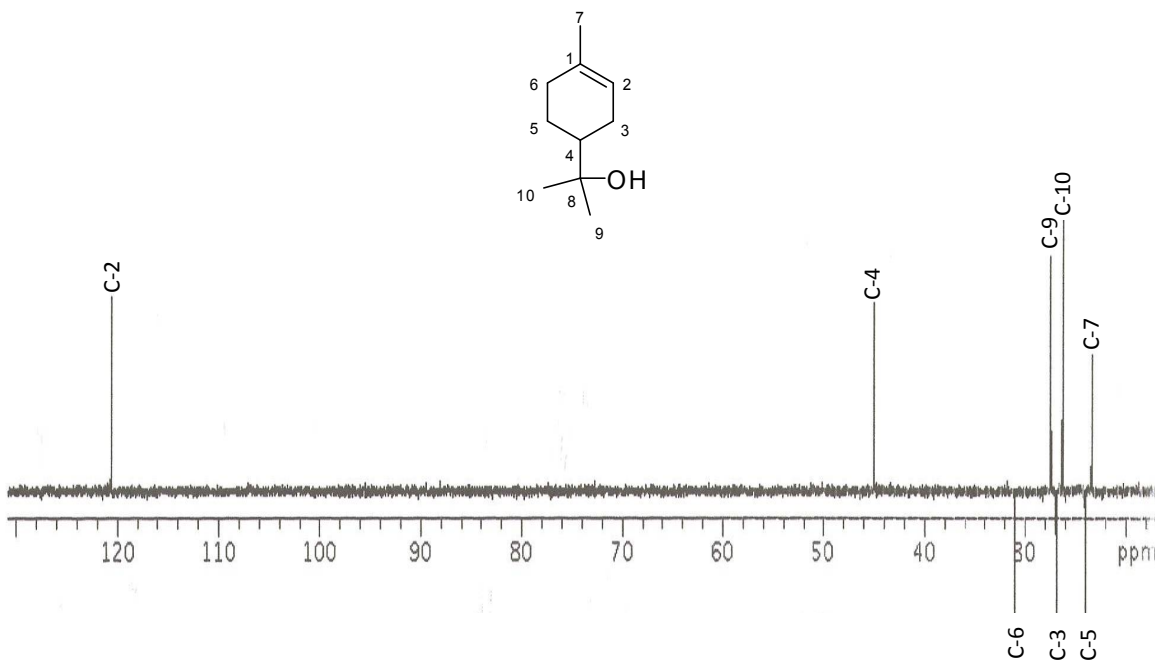

**FIGURE 8:** DEPT 135 of alpha-terpineol (2-(4-methylcyclohex-3-enyl)propan-2-ol).

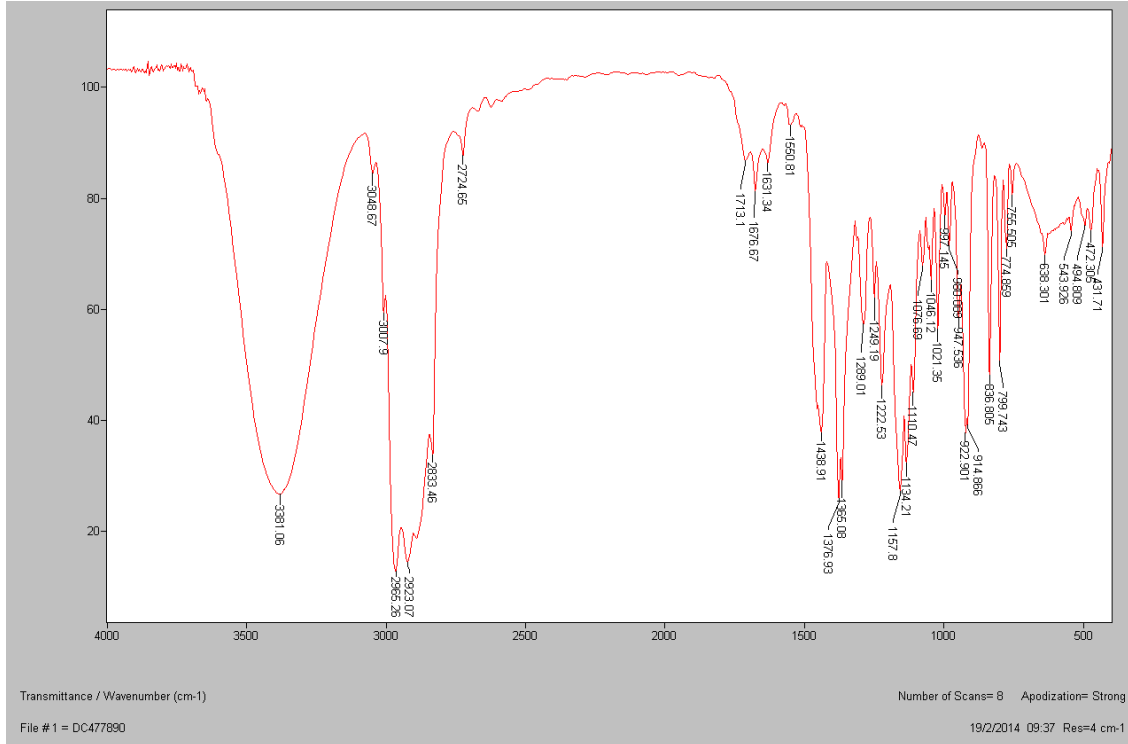

**FIGURE 9:** Infrared spectrum of alpha-terpineol (2-(4-methylcyclohex-3-enyl)propan-2-ol) (KBr).



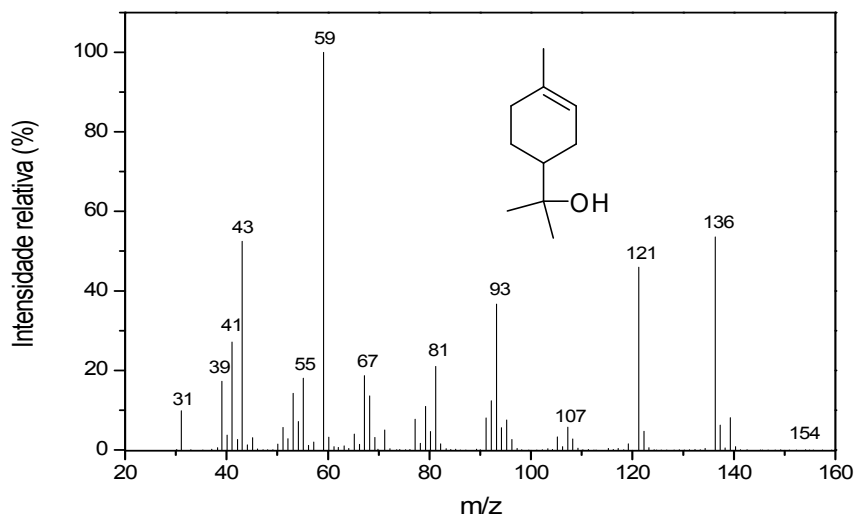

FIGURE 10: Mass spectrum of  $\alpha$ -terpineol (2-(4-methylcyclohex-3-enyl)propan-2-ol) (EI - 70 eV).

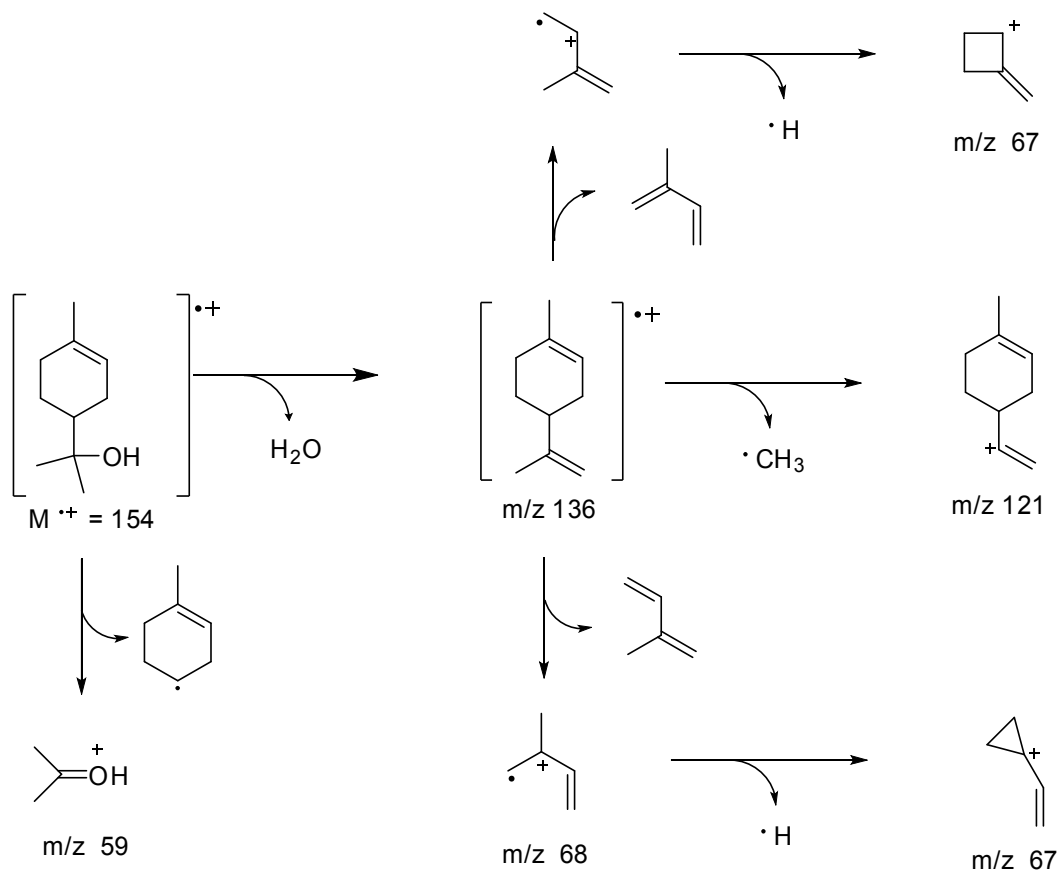





1.  $^1\text{H}$  NMR of spectrum 1-methyl-4-(2-propoxypropan-2-yl)cyclohex-1-ene ( $\text{CDCl}_3$ , 300 MHz).

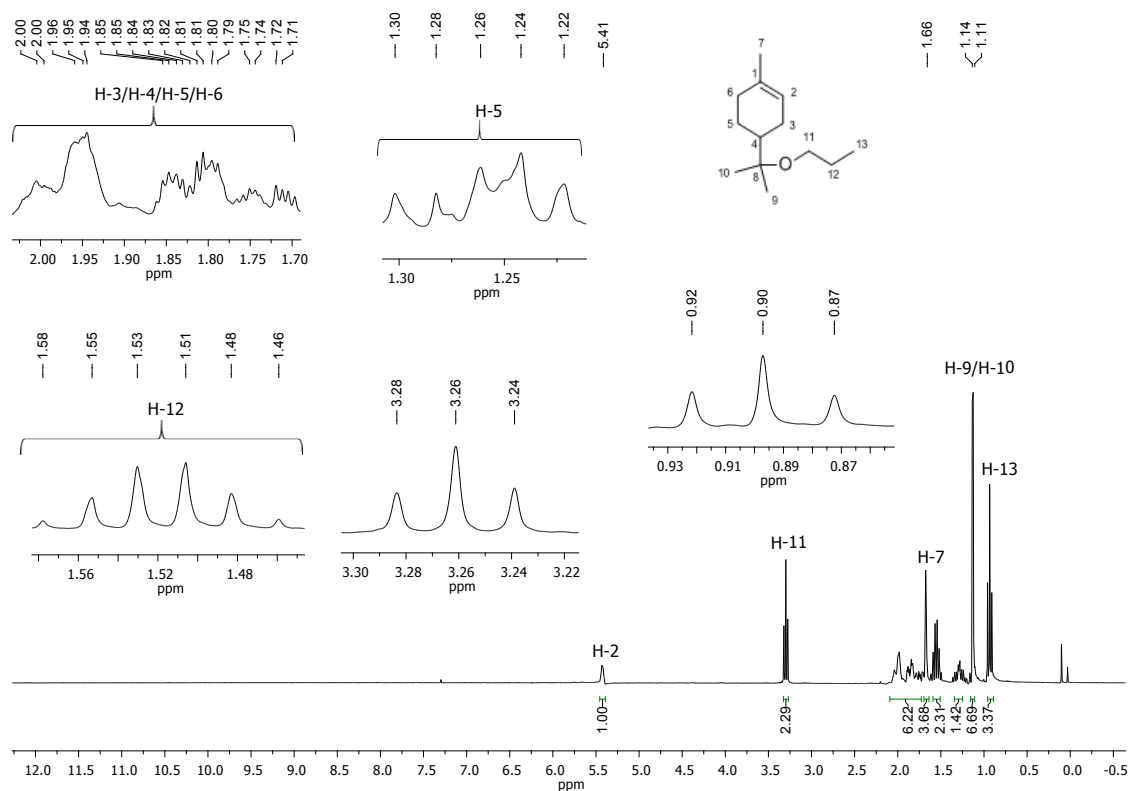

$^1\text{H}$  NMR (300 MHz,  $\text{CDCl}_3$ ):  $\delta$  0.90 (t, 3H,  $J = 7.4$  Hz, H-13); 1.11 (s, 3H, H-9 or H-10); 1.14 (s, 3H, H-9 or H-10); 1.22 – 1.30 (m, 1H, H-5); 1.46 – 1.58 (m, 2H, H-12); 1.66 (s, 3H, H-7); 1.71 – 2.00 (m, 6H, H-3/H-4/H-5/H-6); 3.26 (t, 2H,  $J = 6,7$  Hz, H-11); 5.41 (br s, 1H, H-2).

2. NMR  $^{13}\text{C}$  of spectrum 1-methyl-4-(2-propoxypropan-2-yl)cyclohex-1-ene ( $\text{CDCl}_3$ , 75 MHz).

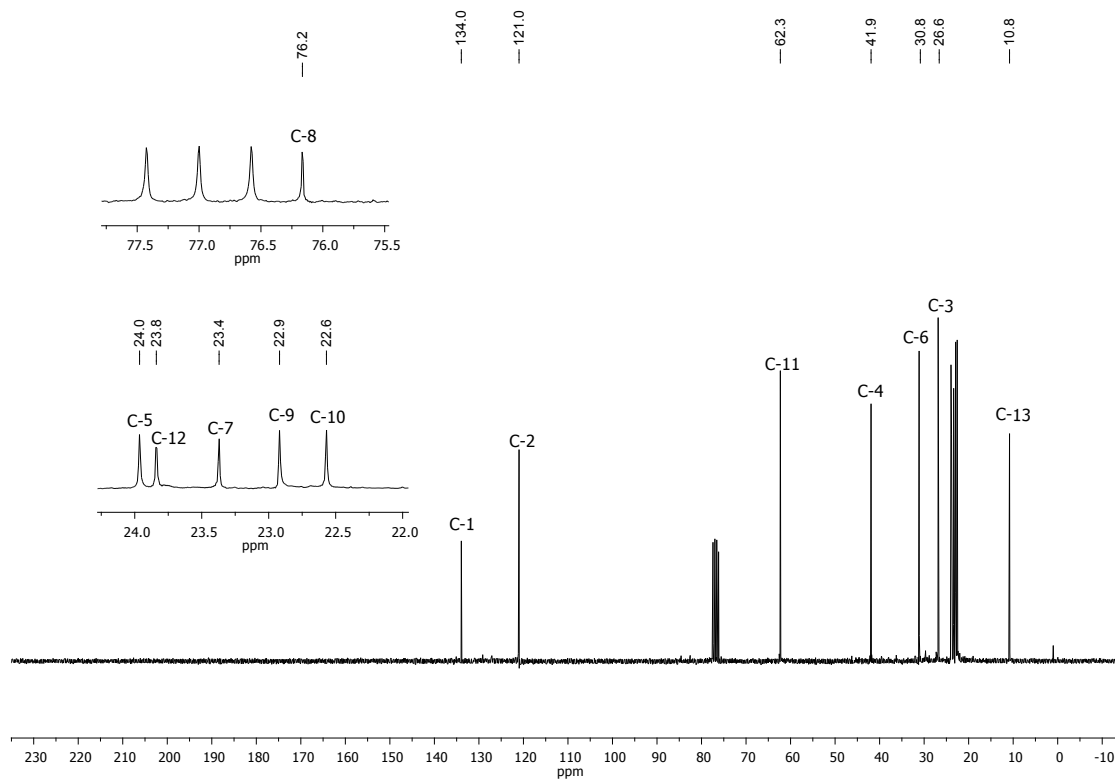

$^{13}\text{C}$  NMR (75 MHz,  $\text{CDCl}_3$ ):  $\delta$  10.8 (C-13); 22.6 (C-10); 22.9 (C-9); 23.4 (C-7); 23.8 (C-12); 24.0 (C-5); 26.8 (C-3); 31.1 (C-6), 41.9 (C-4); 62.3 (C-11); 76.2 (C-8); 121.0 (C-2); 134.0 (C-1).

3. NMR  $^1\text{H}$ ,  $^{13}\text{C}$  of spectrum – HSQC of 1-methyl-4-(2-propoxypropan-2-yl)cyclohex-1-ene

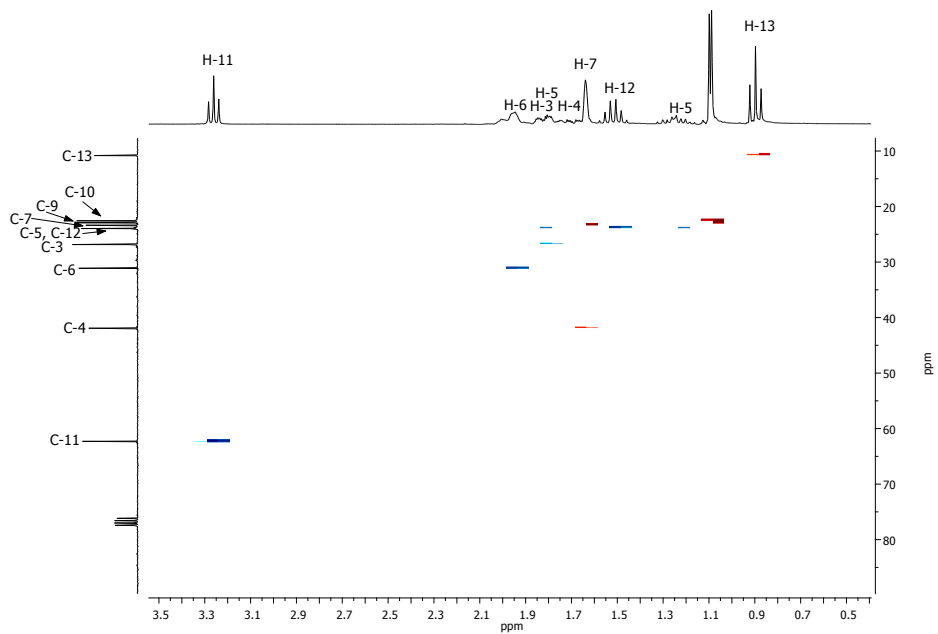

4. NMR  $^1\text{H}$ ,  $^1\text{H}$  of spectrum – COSY of 1-methyl-4-(2-propoxypropan-2-yl)cyclohex-1-ene

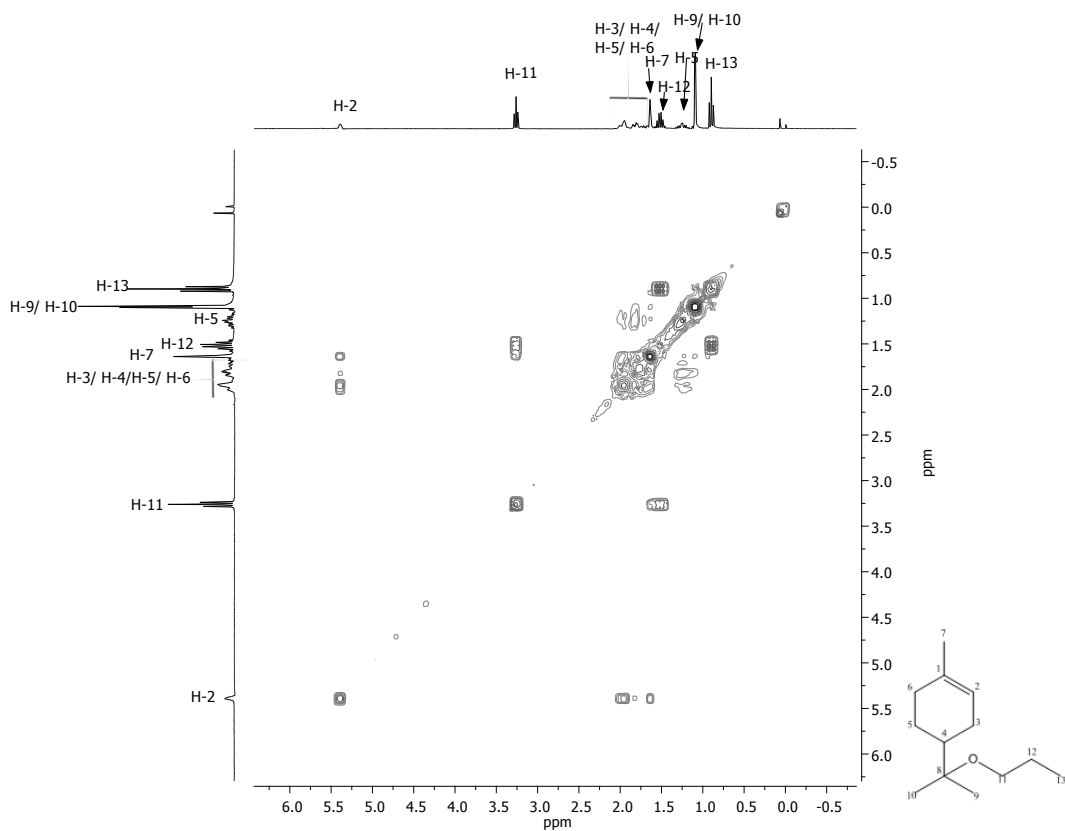

5. DEPT 135 of 1-methyl-4-(2-propoxypropan-2-yl)cyclohex-1-ene

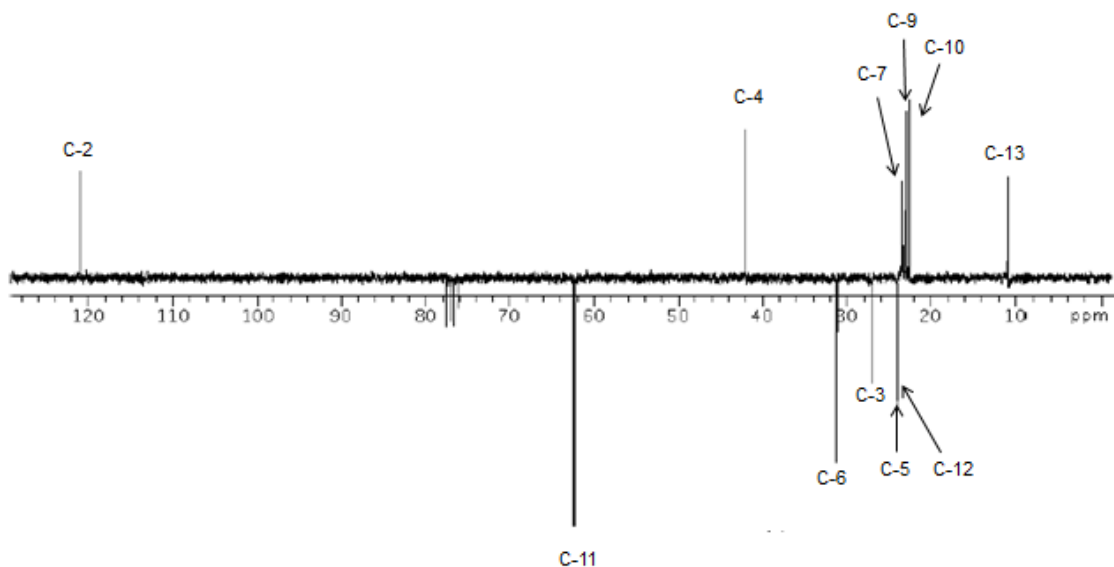

6. Infrared spectrum of 1-methyl-4-(2-propoxypropan-2-yl)cyclohex-1-ene (KBr)

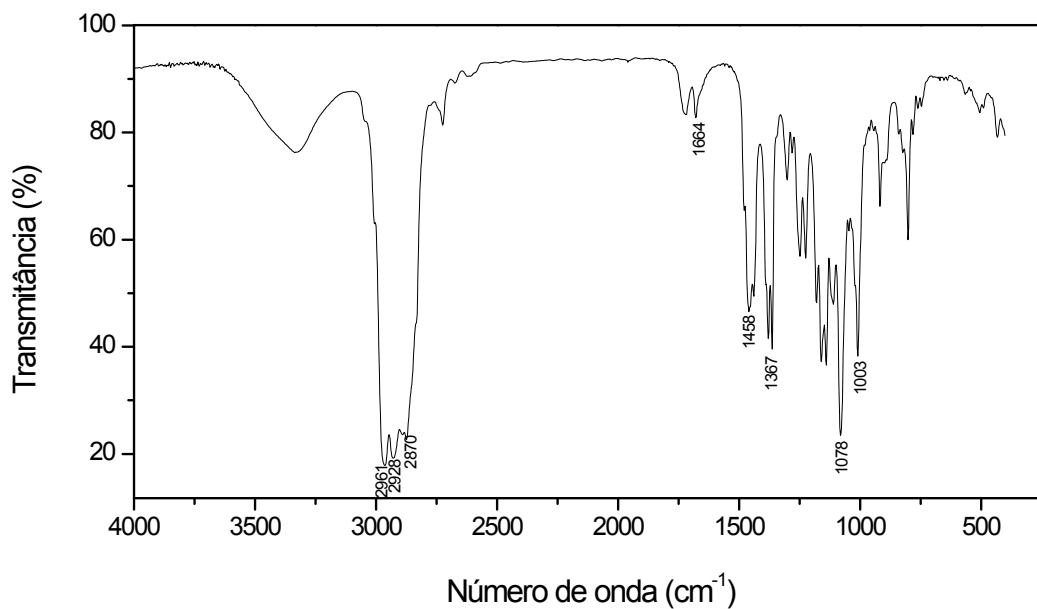

IR (KBr)  $\nu_{\max}/\text{cm}^{-1}$ : 2961, 2918, 2870 ( $\nu_s$  e  $\nu_{as}$  -CH<sub>2</sub> e -CH<sub>3</sub>); 1664 ( $\nu$  C=C endocyclic); 1458, 1367 ( $\delta$  -CH<sub>2</sub> and -CH<sub>3</sub>); 1078 ( $\nu_{as}$  C-O); 1003 ( $\nu_s$  C-O).

7. Mass spectrum of 1-methyl-4-(2-propoxypropan-2-yl)cyclohex-1-ene (EI – 70 eV)

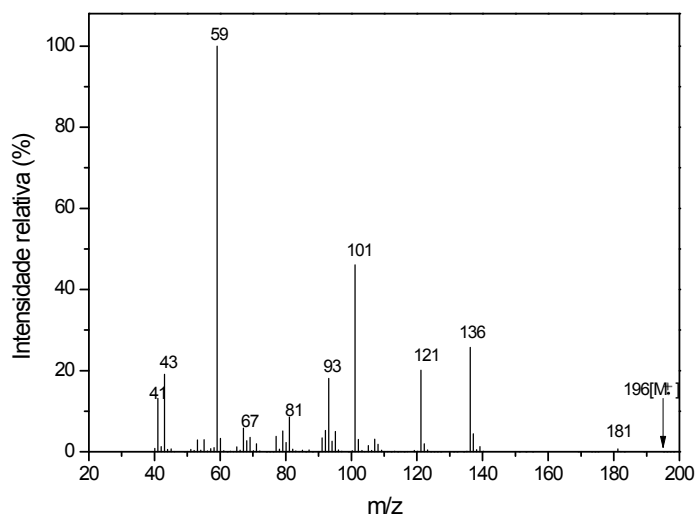

**MS (m/z/int.rel.):** 196/0 (M<sup>+</sup>); 181/1; 136/26; 121/20; 101/46; 93/18; 81/9; 67/6; 59/100; 43/19; 41/13.



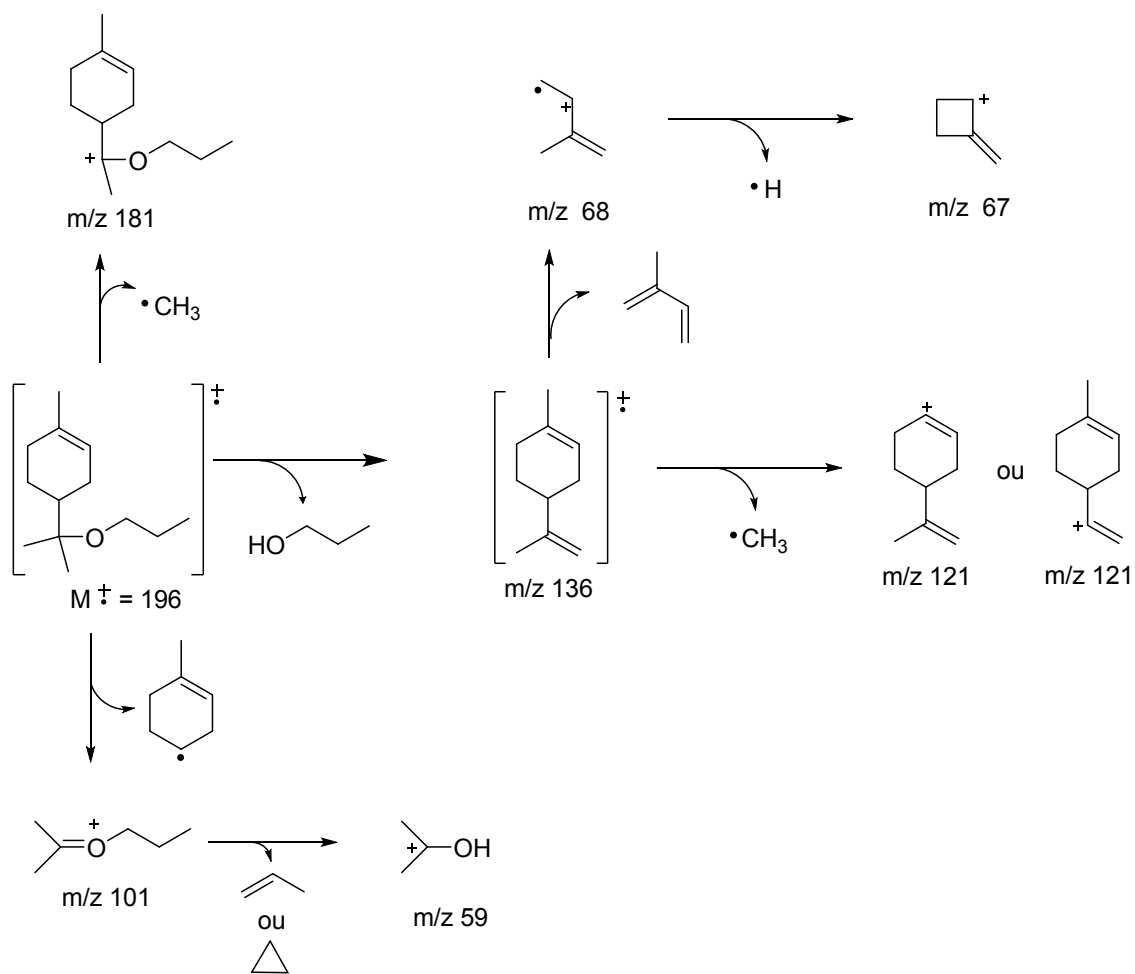

**4-(2-methoxypropan-2-yl)-1-methylcyclohex-1-ene**

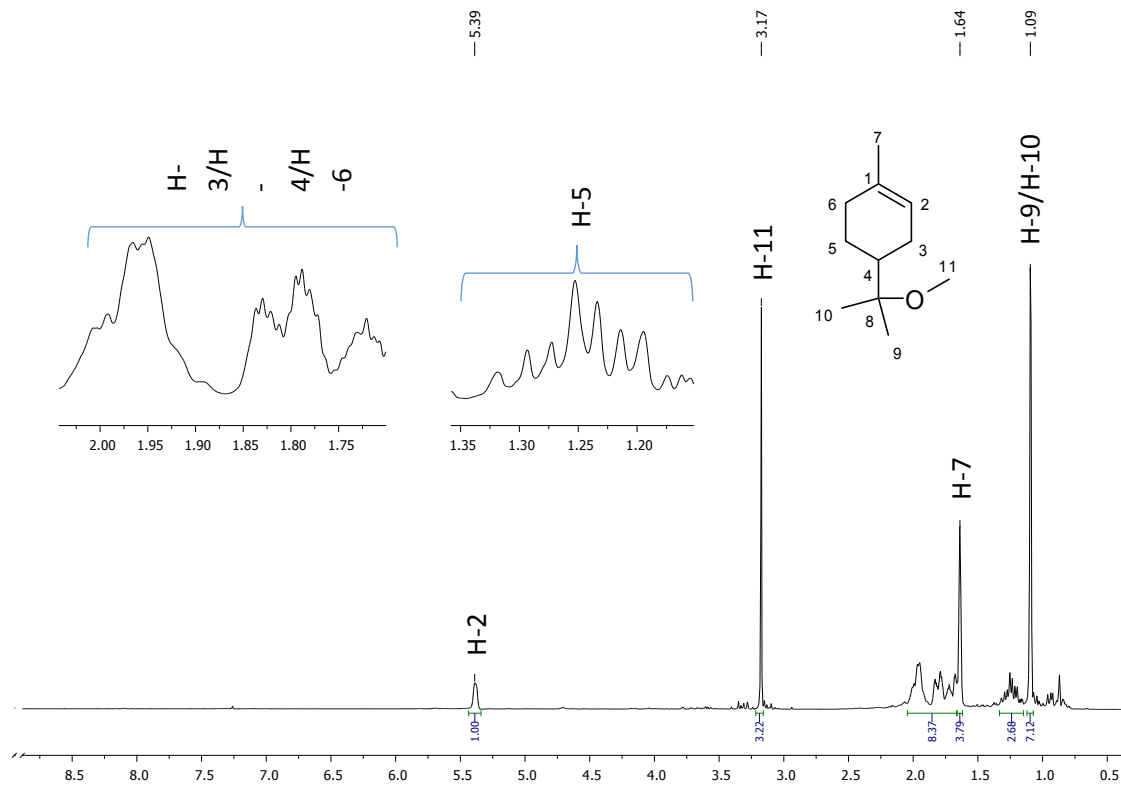

<sup>1</sup>H NMR spectrum of 4-(2-methoxypropan-2-yl)-1-methylcyclohex-1-ene

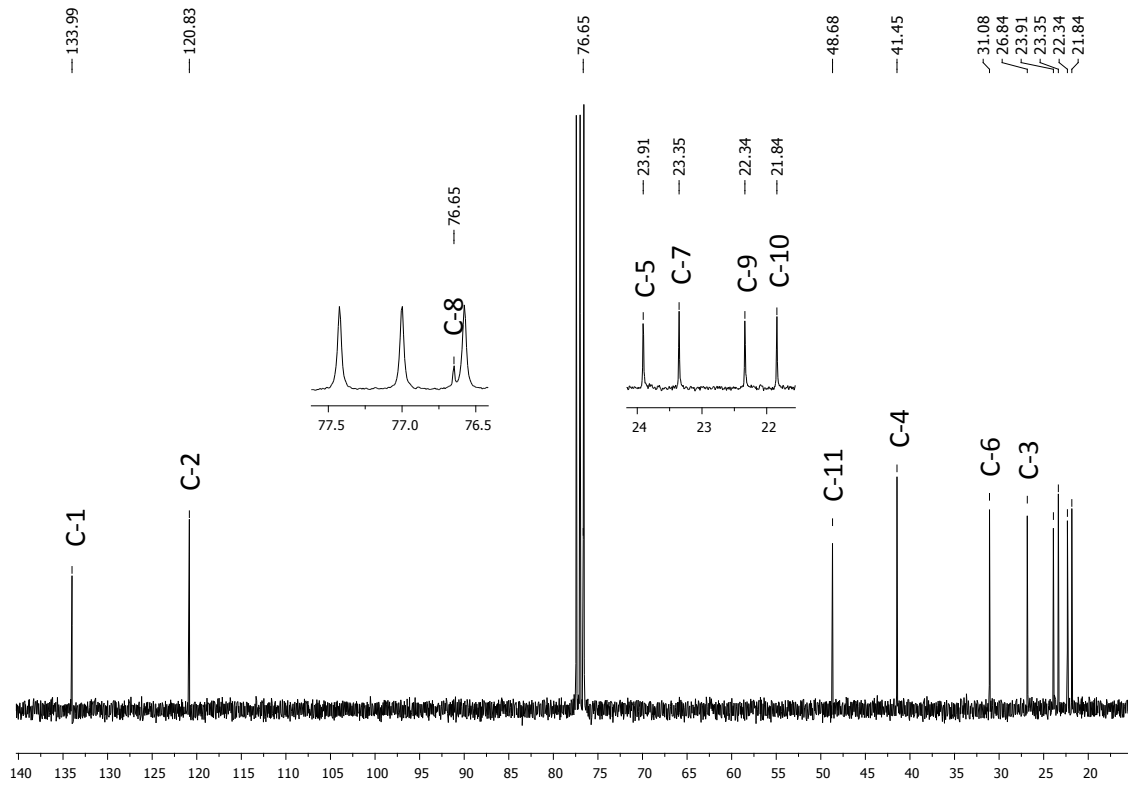

$^{13}\text{C}$  NMR of 4-(2-methoxypropan-2-yl)-1-methylcyclohex-1-ene

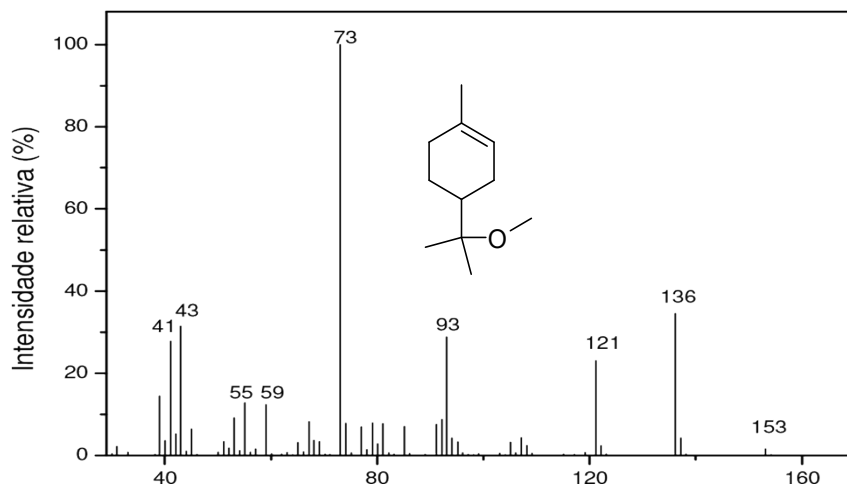

Mass spectrum

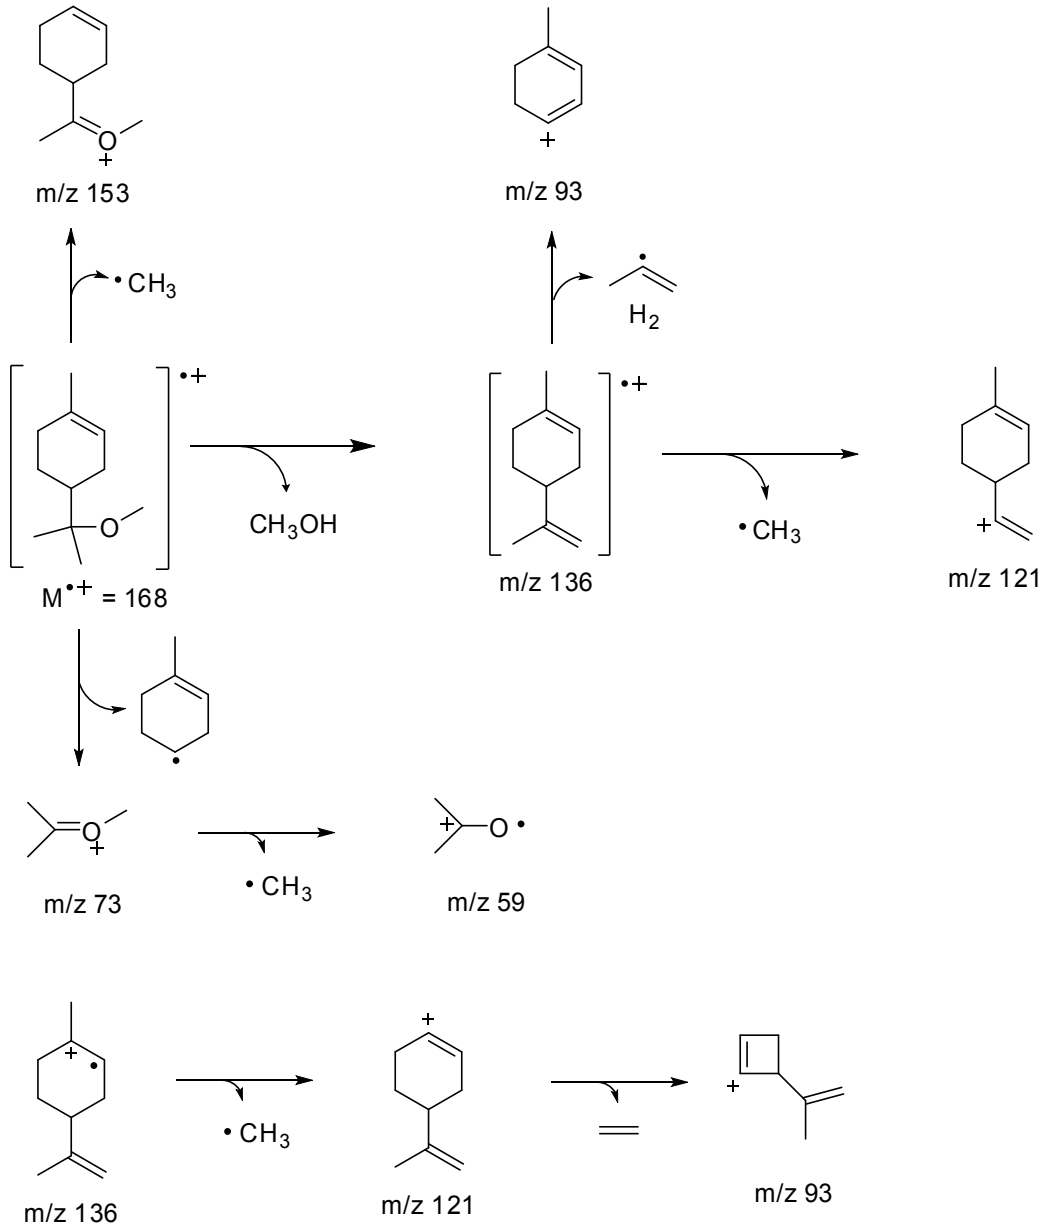

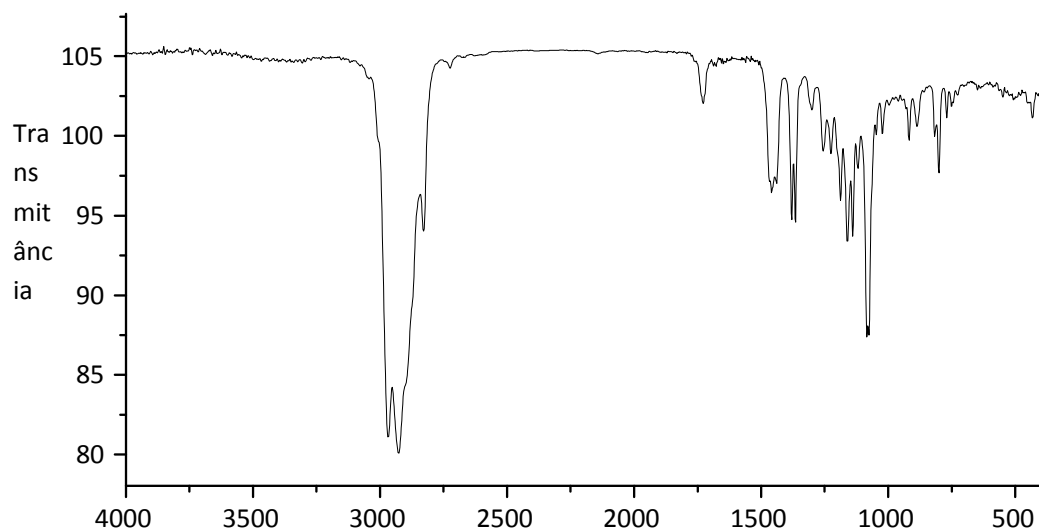

FT-IR spectrum (ATR) of 4-(2-methoxypropan-2-yl)-1-methylcyclohex-1-ene

**<sup>1</sup>H NMR (<sup>1</sup>H (300 MHz, CDCl<sub>3</sub>):**  $\delta$  5.39 (sl, 1H, H-2.); 3.17 (s, 2H, H-11); 2.05 – 1.65 (m, 6H, H-3/H-4/H-6); 1.64 (s, 3H, H-11); 1.35 – 1.10 (m, 1H, H-5); 1.09 (s, 6H, H-9/H-10).

**<sup>13</sup>C NMR (75 MHz, CDCl<sub>3</sub>)**  $\delta$ : 134.0 (C1); 120.8 (C2); 76.6 (C8); 48.7 (C11); 41.5 (C4); 31.1 (C6); 26.8 (C3); 23.9 (C5); 23.4 (C7); 22.3 (C9 or C10); 21.8 (C10 or C9).

**IV (ATR)**  $\delta$  (cm<sup>-1</sup>): 2967; 2926; 2828; 1438; 1378; 1362; 1074.

**MS/EI (m/z/int.rel.):** 153/2; 136/34; 121/23; 93/29; 73/100; 59/12; 55/13; 43/31; 41/28.
